# Supplementary material
Source: Royal Society of Chemistry journal article supplement (doi:10.1039/d6nr01253a)
Supplement: d6nr01253a1.pdf [file d6nr01253a1.pdf]

## Supporting Information

# One-step synthesis of mechanically robust, humidity-stable anti-reflective sub-micron coating with high transparency

*Dahye Ahn<sup>1</sup>, Gyuwon Lee<sup>1</sup>, Yoobin An<sup>1</sup>, Minjeong Kang<sup>1</sup>, Daehun Kim<sup>1</sup>, Huiju Kim<sup>1</sup>, Seongmo Jo<sup>1</sup> and Sung Gap Im<sup>\*1,2</sup>*

<sup>1</sup>Department of Chemical and Biomolecular Engineering, Korea Advanced Institute of Science and Technology (KAIST), Daejeon 34141, Republic of Korea.

<sup>2</sup>Graduate School of Semiconductor Technology, Korea Advanced Institute of Science and Technology (KAIST), 291 Daehak-ro, Yuseong-gu, Daejeon 34141, Republic of Korea

\*Corresponding author \*Corresponding author

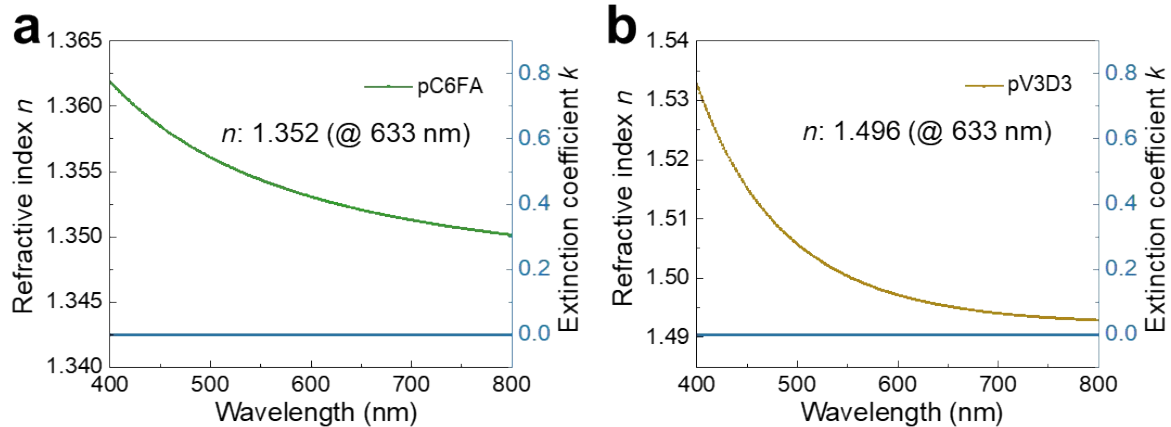

**Fig. S1.** Refractive index and extinction coefficient of pC6FA(a) and pV3D3(b).

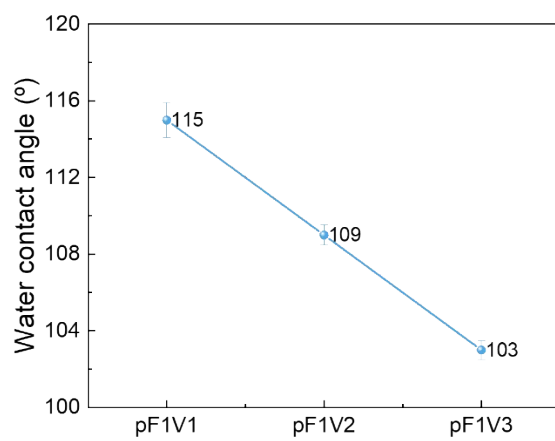

**Fig. S2.** Water contact angle of pFV copolymers.

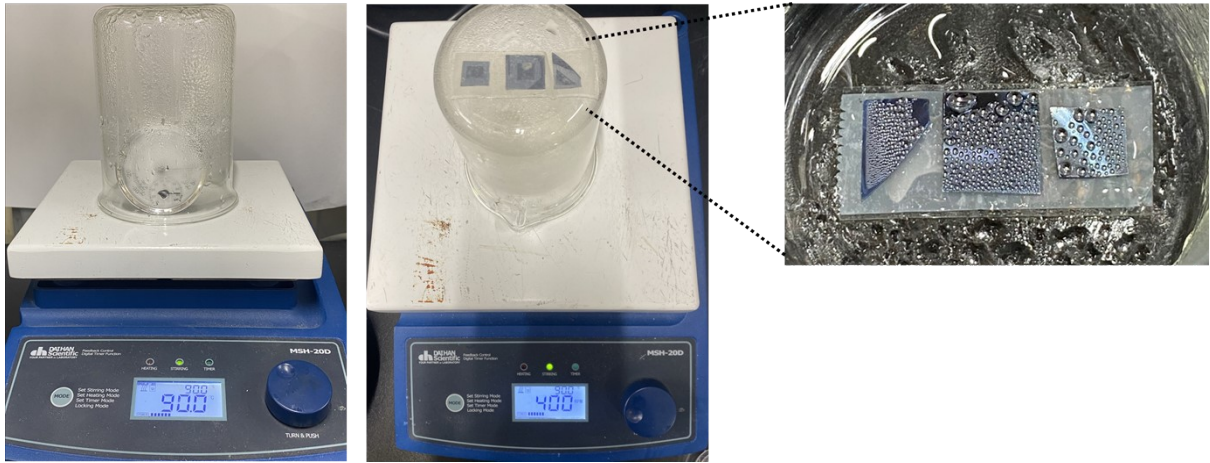

**Fig. S3.** Experimental setup for humidity environment test.

**Table S1.** iCVD process conditions for pFV series

| Polymer | Flow rate (sccm) |       |           | Chamber pressure (mTorr) | Filament temperature (°C) | Substrate temperature (°C) |
|---------|------------------|-------|-----------|--------------------------|---------------------------|----------------------------|
|         | C6FA             | V3D3  | Initiator |                          |                           |                            |
| pF1V1   | 0.440            | 0.432 | 0.440     | 100                      | 140                       | 30                         |
| pF1V2   | 0.440            | 1.441 | 0.440     | 100                      | 140                       | 30                         |
| pF1V3   | 0.440            | 2.190 | 0.440     | 200                      | 140                       | 30                         |

**Table S2.** Surface composition ratios of pFV series via XPS analysis

| Polymer | Atomic ratio (%) |      |       |      | Monomer feed ratio<br>(C6FA:V3D3) | Copolymer ratio<br>(C6FA:V3D3) |
|---------|------------------|------|-------|------|-----------------------------------|--------------------------------|
|         | C1s              | O1s  | F1s   | Si2p |                                   |                                |
| pF1V1   | 40.2             | 6.81 | 52.85 | 0.15 | 1:1                               | 1:0.01                         |
| pF1V2   | 41.28            | 6.91 | 51.62 | 0.19 | 1:3                               | 1:0.02                         |
| pF1V3   | 43.01            | 8.37 | 47.7  | 0.92 | 1:5                               | 1:0.08                         |

**Table S3.** Change in thickness and refractive index of pF1V3 under water immersion

| Immersion time                                 | Initial | 12 hr  | 24 hr  | 36 hr  | 48 hr  |
|------------------------------------------------|---------|--------|--------|--------|--------|
| Thickness (nm)                                 | 598     | 602    | 602    | 603    | 603    |
| Refractive index<br>( $n @ 632.8 \text{ nm}$ ) | 1.3744  | 1.3740 | 1.3746 | 1.3740 | 1.3745 |

**Table S4.** Elemental composition of pFV deposited on PET film via EDS analysis

| Element | Atomic % |
|---------|----------|
| C       | 65.21    |
| O       | 21.78    |
| Si      | 0.21     |
| F       | 12.80    |

**Table S5.** Change in transmittance after cyclic bending test

| Bending cycles              | Initial | 100  | 1,000 | 5,000 | 10,000 |
|-----------------------------|---------|------|-------|-------|--------|
| Transmittance (@<br>633 nm) | 99.8    | 99.8 | 99.6  | 98.4  | 98.4   |
